# Supplementary material for: How Gastrin-Releasing Peptide Opens the Spinal Gate for Itch
Source: PubMed Central journal article supplement (PMC6616317; doi:10.1016/j.neuron.2019.04.022), 2019-07-03
Supplement: mmc1.pdf [file mmc1.pdf]

**Neuron, Volume 103**

## **Supplemental Information**

### **How Gastrin-Releasing Peptide**

### **Opens the Spinal Gate for Itch**

**Martina Pagani, Gioele W. Albigetti, Nandhini Sivakumar, Hendrik Wildner, Mirko Santello, Helge C. Johannssen, and Hanns Ulrich Zeilhofer**

## Supplemental Information

### How gastrin-releasing peptide opens the spinal gate for itch

<sup>1</sup>Martina Pagani, <sup>1</sup>Gioele W. Albigetti, <sup>1</sup>Nandhini Shivakumar, <sup>1</sup>Hendrik Wildner, <sup>1</sup>Mirko Santello,  
<sup>1</sup>Helge C. Johannssen, <sup>1,2,3,4,\*</sup>Hanns Ulrich Zeilhofer

<sup>1</sup>Institute of Pharmacology and Toxicology, University of Zurich, Winterthurerstrasse 190, CH-8057 Zurich, Switzerland

<sup>2</sup>Neuroscience Center Zurich, Winterthurerstrasse 190, CH-8057 Zurich, Switzerland

<sup>3</sup>Drug Discovery Network Zurich, Winterthurerstrasse 190, CH-8057 Zurich, Switzerland

<sup>4</sup>Institute of Pharmaceutical Sciences, Swiss Federal Institute of Technology (ETH) Zurich, Vladimir-Prelog-Weg 1-5/10, CH-8090 Zurich, Switzerland

\* lead contact: Dr. H.U. Zeilhofer, Institute of Pharmacology and Toxicology, University of Zurich, Winterthurerstrasse 190, CH-8057 Zurich, Switzerland.

Phone: +41 44 63 55912, FAX: +41 44 63 55988, Email: [zeilhofer@pharma.uzh.ch](mailto:zeilhofer@pharma.uzh.ch)

## Supplemental figures

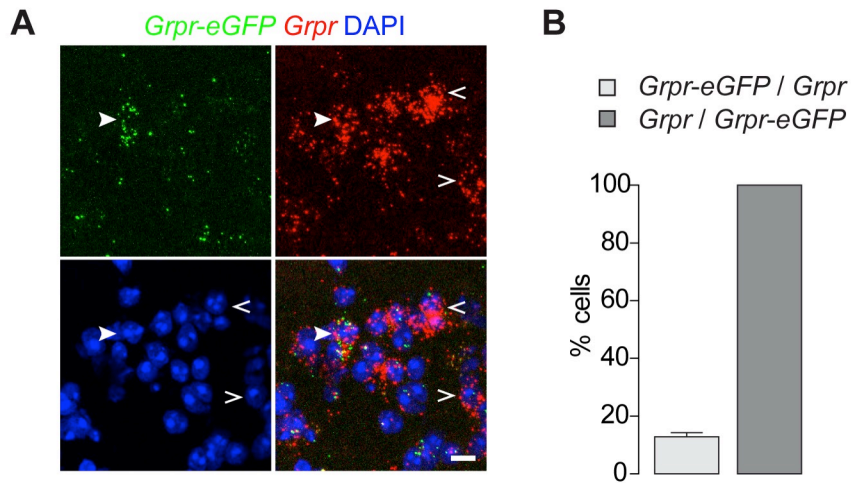

### Supplemental figure 1. *Grpr* expression in *Grpr*-eGFP cells of *Grpr::eGFP* mice, Related to Figure 1.

(A) *In situ* hybridization on lumbar spinal cord section from *Grpr::eGFP* mouse showing that eGFP expression is restricted to *Grpr* mRNA positive neurons but only a small percentage of *Grpr* mRNA-positive neurons also express eGFP. Solid arrowheads indicate an eGFP positive *Grpr*-expressing neuron, open arrowheads indicate two examples of *Grpr*-expressing neurons devoid of eGFP. Scale bar, 10  $\mu$ m.

(B) Quantification of double *in situ* hybridization. All analyzed *Grpr*-eGFP cells were positive for *Grpr* mRNA (41 out of 41 cells). Thirteen  $\pm$  1 % *Grpr* mRNA-positive cells expressed eGFP (41 out of 307 cells). Fifteen sections from 3 mice were analyzed (mean  $\pm$  sem).

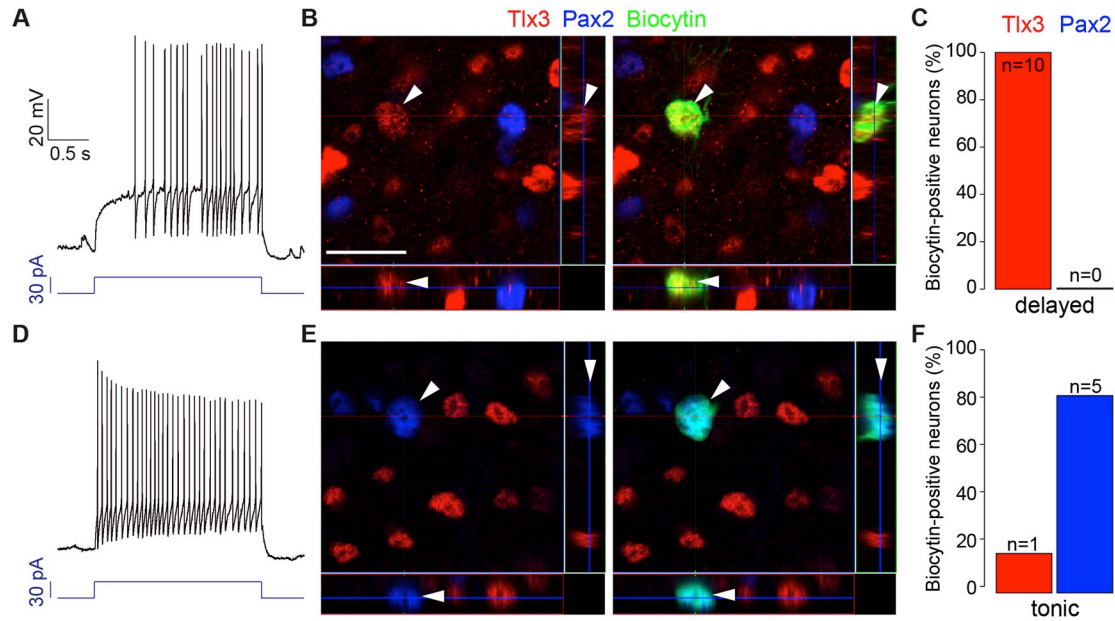

**Supplemental figure2. Post-hoc neurochemical characterization of delayed and tonic firing neurons, Related to Figure1.**

(A) Delayed firing pattern in a *Grpr*-eGFP neuron that was filled with biocytin during whole-cell recording.

(B) High resolution analysis of a delayed firing *Grpr*-eGFP neuron (arrowheads) that has been filled with biocytin during whole-cell recording. After completion of the recording, the slice was processed for immunostaining and reacted with streptavidin-488 (green). Co-labelling with antibodies against Tlx3 (red) and Pax2 (blue) confirms the excitatory phenotype. Scale bar, 20  $\mu$ m.

(C) All the 10 cells that showed a delayed firing pattern during whole-cell recording were Tlx3-positive and Pax2-negative.

(D) Tonic firing pattern in a *Grpr*-eGFP neuron.

(E) same as (B) but tonic firing Pax2-positive neuron.

(F) same as (BC) but for tonic firing neurons.

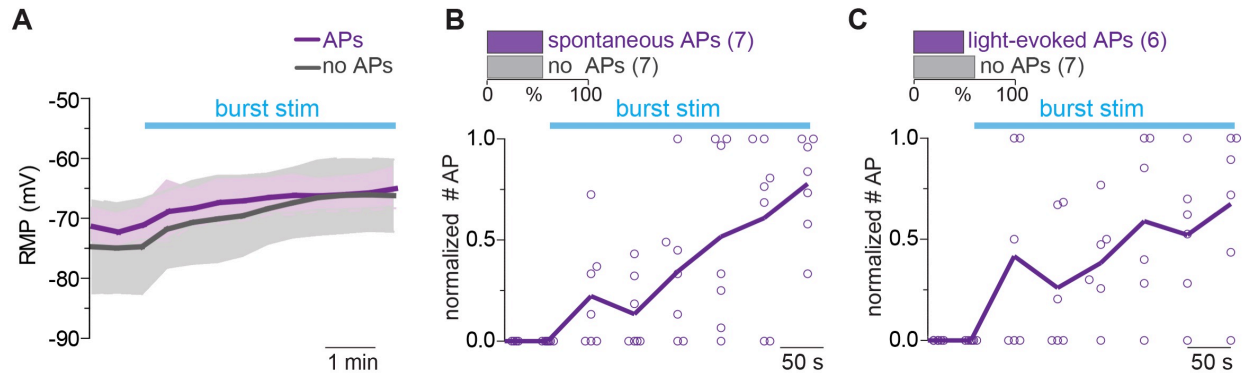

**Supplemental figure 3. Time course of GRP-induced depolarization and action potential firing, Related to Figure 3.**

(A) Time courses of resting membrane potential changes in *Grpr*:eGFP neurons that fired action potentials (n = 7, purple) or that did not fire action potentials (n = 7, gray) during repetitive burst stimulation of *Grp*-ChR2 neurons (blue line). Shaded lines represent mean  $\pm$  sem.

(B) Top: incidence of GRPR neurons that fired spontaneous action potentials during burst-like light stimulation of GRP neurons. Bottom: scatter plot showing time course of normalized spontaneous action potentials. Open circles are individual cells (n = 7), solid line connects average values.

(C) Same as (B) but light-evoked action potentials (n = 6 cells).

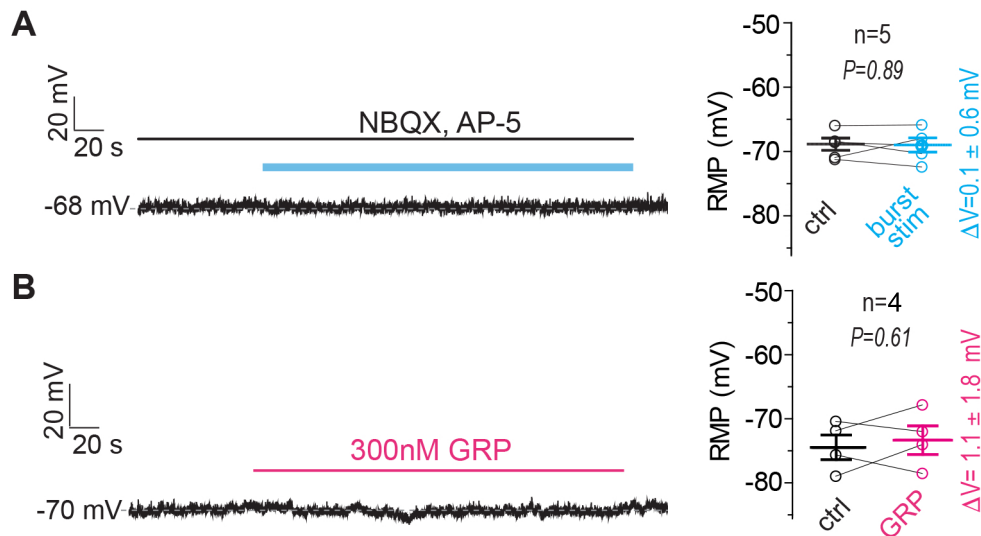

**Supplemental figure 4. Tonic firing GRPR<sub>inhib</sub> neurons do not depolarize during repetitive burst-like stimulation of *Grp*-ChR2 neurons or superfusion with GRP, Related to Figure 3.**

(A) Voltage responses in tonic firing *Grpr*-eGFP neurons elicited by repetitive burst-like stimulation of *Grp*-ChR2 neurons (blue line). Right: paired plot showing resting membrane potential (RMP) before (black) and 5 min after repetitive burst-like light stimulation (blue). Circles are individual cells (n = 5 from 5 animals; two-tailed, paired t-test, P = 0.89). Error bars indicate mean  $\pm$  sem.

(B) Same as (A), but superfusion with GRP (magenta line, 300 nM) instead of presynaptic light stimulation (n = 4 from 4 mice; two-tailed, paired t-test, P = 0.61).
